# Supplementary material for: A Complexed Initiating System AlCl3·Phenetole/TiCl4·H2O with Dominant Synergistic Effect for Efficient Synthesis of High Molecular Weight Polyisobutylene
Source: MDPI journal article supplement (doi:10.3390/polym11122121), 2019-12-17
Supplement: s1 [file s1]

Supporting Information

# A Complexed Initiating System AlCl<sub>3</sub>·Phenetole/TiCl<sub>4</sub>·H<sub>2</sub>O with Dominant Synergistic Effect for Efficient Synthesis of High Molecular Weight Polyisobutylene

Yulong Jin, Liang Chen, Xing Guo, Linfeng Xu, Zhihua Zhu, Zhen Liu, Ruihua Cheng and  
Boping Liu\*

College of Materials and Energy, South China Agricultural University, Wushan Road 483, Guangzhou  
510630, China

E-mail: boping@scau.edu.cn

State Key Laboratory of Chemical Engineering, East China University of Science and Technology, Meilong  
Road 130, Shanghai 200237, China

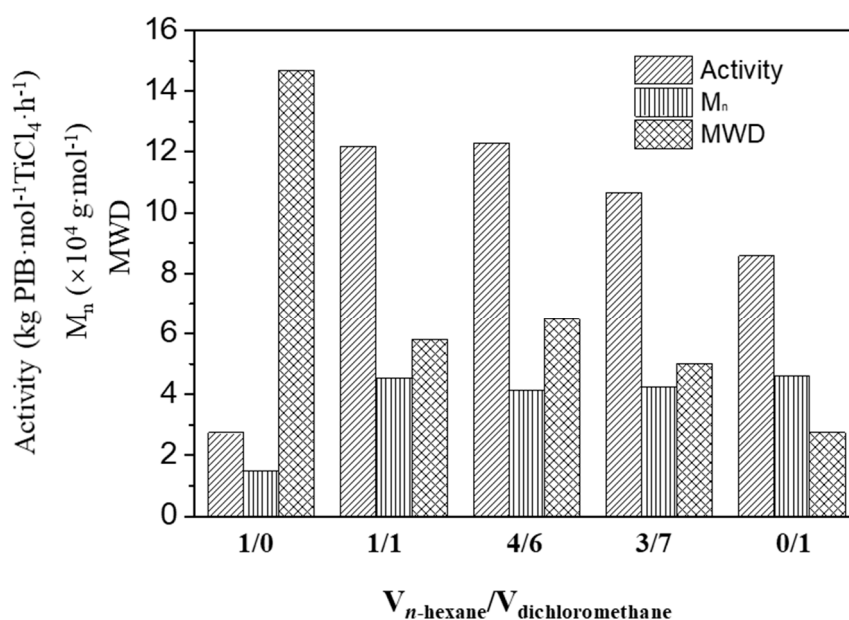

**Figure S1.** The effect of solvent polarity on TiCl<sub>4</sub>/H<sub>2</sub>O for IB polymerization ([IB] = 2.9 mol·L<sup>-1</sup>; [H<sub>2</sub>O] = 20 mmol·L<sup>-1</sup>; [TiCl<sub>4</sub>] = 30 mmol·L<sup>-1</sup>; t<sub>p</sub>=30 min; T<sub>p</sub> = -60 °C.).

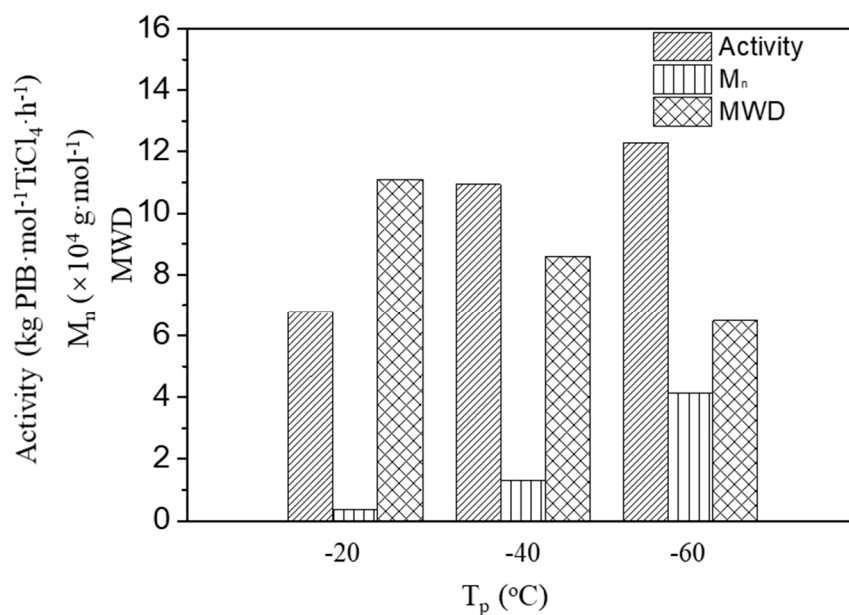

**Figure S2.** The effect of  $T_p$  on  $\text{TiCl}_4/\text{H}_2\text{O}$  for IB polymerization ( $[\text{IB}] = 2.9 \text{ mol}\cdot\text{L}^{-1}$ ;  $[\text{H}_2\text{O}] = 20 \text{ mmol}\cdot\text{L}^{-1}$ ;  $[\text{TiCl}_4] = 30 \text{ mmol}\cdot\text{L}^{-1}$ ; 60 mL  $\text{C}_2\text{H}_2\text{Cl}_2$ ; 40 mL n-hexane;  $t_p = 30 \text{ min}$ )

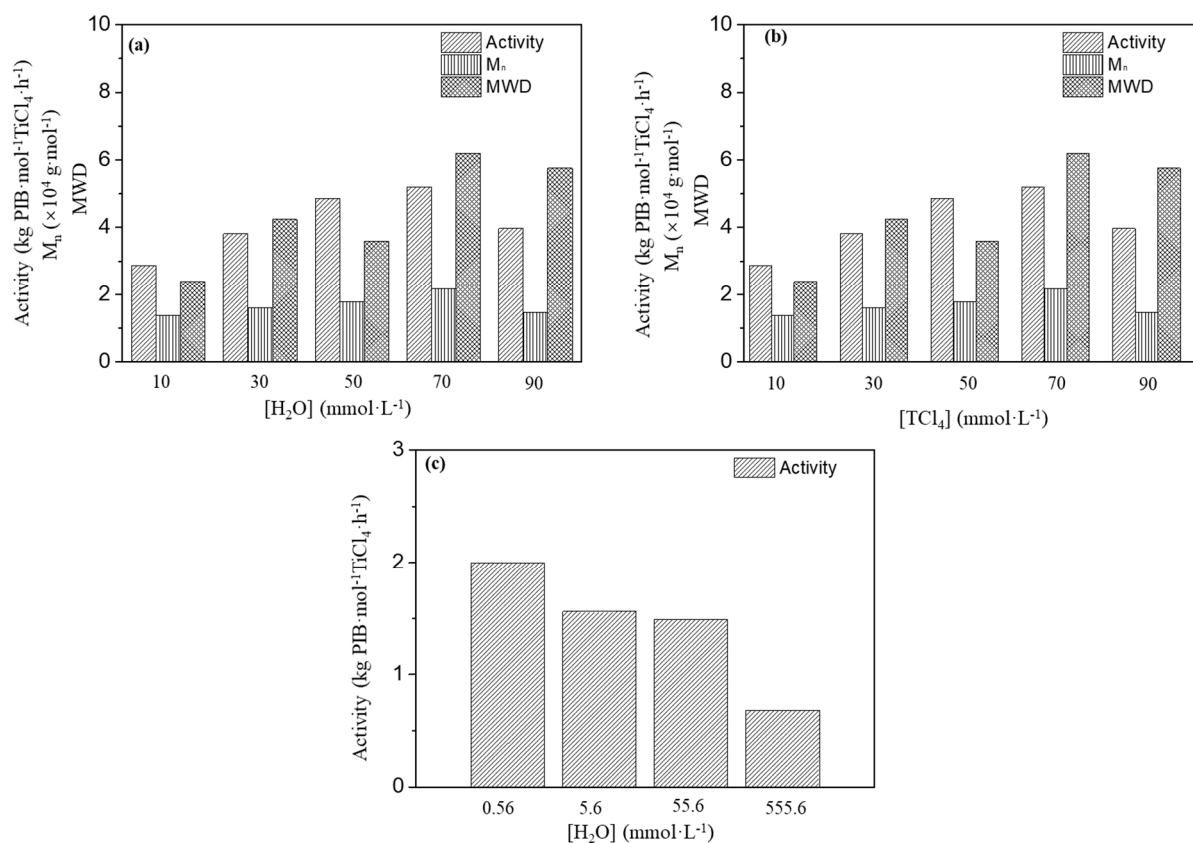

**Figure S3.** The effect of  $[\text{H}_2\text{O}]$  and  $[\text{TiCl}_4]$  on IB polymerization ((a)  $[\text{TiCl}_4] = 50 \text{ mmol}\cdot\text{L}^{-1}$ ; (b)  $[\text{H}_2\text{O}] = 40 \text{ mmol}\cdot\text{L}^{-1}$ ; (c)  $[\text{TiCl}_4] = 4.56 \text{ mmol}\cdot\text{L}^{-1}$ ; Other conditions:  $[\text{IB}] = 2.9 \text{ mol}\cdot\text{L}^{-1}$ ; 60 mL  $\text{C}_2\text{H}_2\text{Cl}_2$ ; 40 mL n-hexane;  $t_p = 30 \text{ min}$ ;  $T_p = -60^\circ\text{C}$ ).

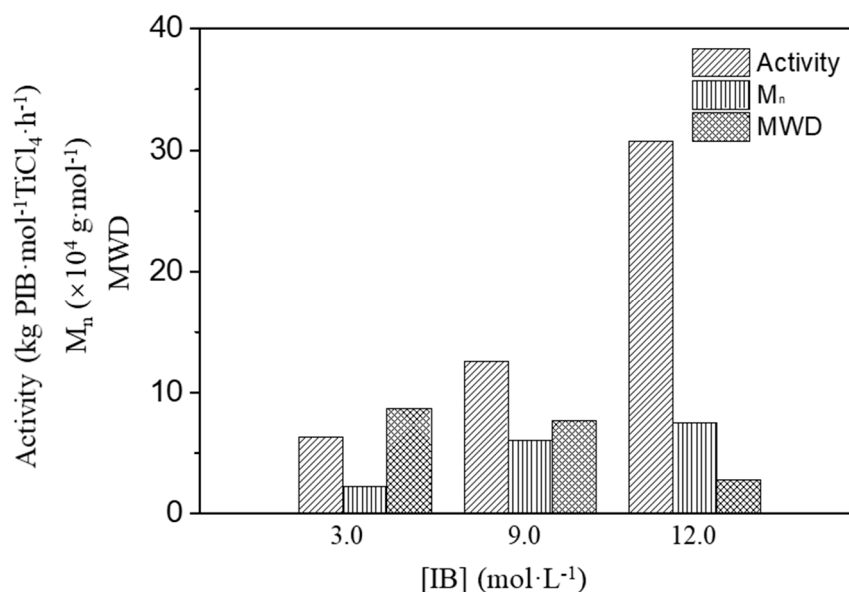

**Figure S4.** The effect of monomer concentration on  $\text{TiCl}_4/\text{H}_2\text{O}$  for IB polymerization ( $[\text{H}_2\text{O}] = 30 \text{ mmol}\cdot\text{L}^{-1}$ ;  $[\text{TiCl}_4] = 20 \text{ mmol}\cdot\text{L}^{-1}$ ; 60 mL  $\text{C}_2\text{H}_2\text{Cl}_2$ ; 40 mL n-hexane;  $t_p = 30 \text{ min}$ ;  $T_p = -60^\circ\text{C}$ ).

The effect of various reaction conditions on the polymerization behaviors of  $\text{TiCl}_4/\text{H}_2\text{O}$  were investigated as well (see **Figure S1-S4**). The results indicated that  $\text{TiCl}_4/\text{H}_2\text{O}$  was good at producing high or medium molecular weight polyisobutylene with  $M_n = 1\sim 6 \times 10^4 \text{ g}\cdot\text{mol}^{-1}$  and the MWD of the polymer was relatively broad. In addition, this initiating system showed low efficiency, and activity  $\approx 10 \text{ kg PIB}\cdot\text{mol}^{-1}\text{TiCl}_4\cdot\text{h}^{-1}$  could be observed in most cases, thus a much higher catalyst concentration was needed to achieve a reasonable monomer conversion. This was also in accordance with the reported work that the dimer of  $\text{TiCl}_4$  was the active coinitiator for cationic polymerization, and a relatively high concentration of  $\text{TiCl}_4$  was needed for achieving reasonable polymerization rate [S1].

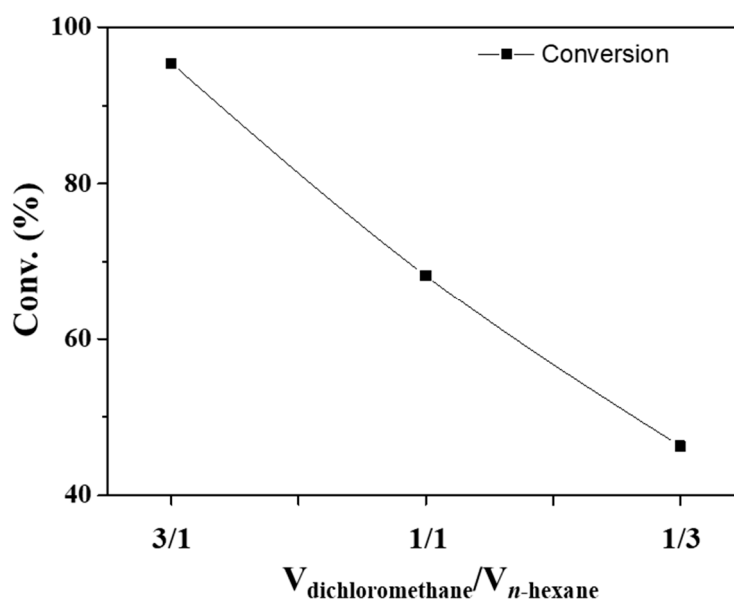

**Figure S5.** The effect of solvent polarity on monomer conversion with  $\text{AlCl}_3/\text{phenetole}$  initiating system ( $[\text{IB}] = 4 \text{ mol}\cdot\text{L}^{-1}$ ;  $V_{\text{dichloromethane}} + V_{\text{n-hexane}} = 100 \text{ mL}$ ;  $T_p = -60^\circ\text{C}$ ;  $t_p = 30 \text{ min}$ ;  $[\text{AlCl}_3]/[\text{phenetole}] = 1/1$ ).

According to **Figure S5**, a relatively stronger polarity of the solvent was more favored by the  $\text{AlCl}_3$ /phenetole initiating system to achieve high monomer conversion, as more polar conditions could possibly help to produce more active ion pairs for IB polymerization <sup>[S2]</sup>.

## References

[S1] M. Tawada, R. Faust. *Macromolecules* **2005**, *38*, 4989.

[S2] L. Sipos, P. De, R. Faust. *Macromolecules* **2003**, *36*, 8282.

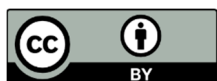

© 2020 by the authors. Submitted for possible open access publication under the terms and conditions of the Creative Commons Attribution (CC BY) license (<http://creativecommons.org/licenses/by/4.0/>).
